# Supplementary material for: Differential protein expression level identification by knockout of 14-3-3τ with siRNA technique and 2DE followed MALDI-TOF-TOF-MS
Source: Royal Society of Chemistry journal article supplement (doi:10.1039/c0an00309c), 2010-11-03
Supplement: c0an00309c.pdf [file c0an00309c.pdf]

**Table S1:** List for differential expressed protein identified by RNAi technique interfere 14-3-3 tau protein

| Spot No. | Accession number | Protein Name                                        | Mw(Dalton) | pI   | Functional association                                                                                                                                           | Up-or down-regulated |
|----------|------------------|-----------------------------------------------------|------------|------|------------------------------------------------------------------------------------------------------------------------------------------------------------------|----------------------|
| C5       | IPI00000816      | 14-3-3 protein epsilon                              | 29155.4    | 4.63 | DNA/RNA binding protein                                                                                                                                          | ↑                    |
| C7/D1    | IPI00021439      | Actin, cytoplasmic 1                                | 41709.7    | 5.29 | structural constituent of muscle, motor activity                                                                                                                 | ↑                    |
| C11      | IPI00553164      | Ribosomal protein SA, 67kDa                         | 32833.4    | 4.79 | laminin receptor                                                                                                                                                 | ↑                    |
| C15      | IPI00479143      | Pericentrin 2                                       | 377849.5   | 5.39 | in the centrosomes                                                                                                                                               | ↓                    |
| C17      | IPI00017334      | Prohibitin                                          | 29785.9    | 5.57 | a potential tumor suppressor protein, a novel cytoplasmic anti proliferative protein widely expressed in a variety of tissues, inhibits DNA synthesis            | ↑                    |
| C19      | IPI00291939      | Structural maintenance of chromosome 1-like protein | 143144.1   | 7.51 | regulatory elements, can link nucleic acids in facilitating an RNAi mediated epigenetic modification involving secondary siRNAs and spreading of DNA methylation | ↓                    |

|               |             |                                                             |          |      |                                                                                                                                                                   |   |
|---------------|-------------|-------------------------------------------------------------|----------|------|-------------------------------------------------------------------------------------------------------------------------------------------------------------------|---|
| C21           | IPI00291005 | Malate dehydrogenase,<br>cytoplasmic                        | 36272    | 6.89 | an enzyme in the citric acid cycle that catalyzes the conversion of malate into oxaloacetate, polymerase delta in eukaryotic cells                                | ↓ |
| C23/D6        | IPI00556624 | Keratin 1                                                   | 66027    | 8.16 | a member of the keratin family, specifically expressed in the spinous and granular layers of the epidermis                                                        | ↓ |
| C2            | IPI00008530 | 60S acidic ribosomal protein<br>P0                          | 34251.8  | 5.71 | structural constituent of ribosome which are the particles catalyses mRNA to protein synthesis                                                                    | ↑ |
| C4/C8/C1<br>2 | IPI00411559 | Splice Isoform 1 of Structural<br>maintenance of chromosome | 147090.5 | 6.37 | has DNA-dependent ATPase activity and is involved in DNA recombination repair, chromosome condensation, and sister-chromatid cohesion, during mitosis and meiosis | ↓ |
| C6            | IPI00022314 | Mn-Oxidation dismutase<br>[Mn], mitochondrial precursor     | 24706.6  | 8.35 | manganese ion binding, superoxide dismutase activity, oxidoreductase, superoxide metabolic process                                                                | ↑ |
| C10           | IPI00063523 | similar to Centromeric protein<br>E (CENP-E protein)        | 741434.4 | 9.06 | a kinesin-related microtubule motor protein that is essential for chromosome congression during mitosis                                                           | ↓ |
| C14 /D12      | IPI00303335 | Tax                                                         | 772727.2 | 9.1  | play a central role in the process leading to ATL, modulates the expression of many viral and cellular genes                                                      | ↓ |

|                |             |                                                                   |         |      |                                                                                                                                                |   |
|----------------|-------------|-------------------------------------------------------------------|---------|------|------------------------------------------------------------------------------------------------------------------------------------------------|---|
| C16/D15        | IPI00220327 | Keratin, type II cytoskeletal 1                                   | 65846.9 | 8.16 | regulate the activity of kinases such as PKC and SRC via binding to integrin beta-1 and the receptor of activated protein kinase C             | ↑ |
| D5 /D2         | IPI00297779 | T-complex protein                                                 | 57321.1 | 6.02 | a molecular chaperone assisting in the folding of proteins in eukaryotic cytosol, cytosolic folding machinery                                  | ↓ |
| D7/D11/<br>D13 | IPI00216952 | Splice Isoform C of Lamin A/C                                     | 65095.6 | 6.4  | intermediate filament protein, primordial components of the cytoskeleton and the nuclear envelope                                              | ↑ |
| D9             | IPI00300452 | Ankyrin repeat                                                    | 86609.7 | 8.51 | transcriptional initiators, cell cycle regulators, ion transporters and signal transducers mediating protein protein interactions              | ↑ |
| D17            | IPI00059639 | OTTHUMP00000016588                                                | 26737.4 | 8.15 | chromosome 6 open reading frame 141, protein-coding                                                                                            | ↑ |
| D19            | IPI00333838 | Coenzyme Cytosolic acyl coenzyme A thioester hydrolase, inducible | 46248.1 | 6.9  | a group of enzymes that catalyze the hydrolysis of acyl-CoA thioesters to free fatty acids                                                     | ↓ |
| D21            | IPI00472614 | Splice Isoform 1 of ERC protein 2                                 | 110490  | 6.51 | thought to be involved in the organization of the cytomatrix at the nerve terminals active zone (CAZ) which regulates neurotransmitter release | ↓ |
| D23            | IPI00021570 | Splice Isoform 1 of                                               | 16358.9 | 9.95 | tumor necrosis factor receptor, the                                                                                                            |   |

|        |             |                                                 |          |      |                                                                                                                                                                                                           |   |
|--------|-------------|-------------------------------------------------|----------|------|-----------------------------------------------------------------------------------------------------------------------------------------------------------------------------------------------------------|---|
|        |             | Endothelial<br>differentiation-related factor 1 |          |      | transcription factor may or may not<br>also interact selectively with a<br>protein or macromolecular complex                                                                                              | ↑ |
| D4     | IPI00186290 | Elongation growth factor 2                      | 95145.9  | 6.42 | plays an important role in the<br>process of protein synthesis                                                                                                                                            | ↓ |
| D8     |             |                                                 | 47008.3  | 6.99 | a plasminogen receptor on the<br>surface of a variety of hematopoetic,<br>epithelial and endothelial cells, may<br>play an important role in the<br>intravascular and pericellular<br>fibrinolytic system | ↓ |
|        | IPI00465248 | $\alpha$ -enolase                               |          |      |                                                                                                                                                                                                           |   |
| D14    |             | Centromere protein F,<br>350/400ka              | 357305.9 | 5.06 | a component of the nuclear matrix during<br>the G2 phase of inter-phase                                                                                                                                   | ↑ |
|        | IPI00477166 |                                                 |          |      |                                                                                                                                                                                                           |   |
| D16    |             | Similar to Zinc finger protein<br>OZF           | 67813.8  | 9.38 | overexpressed in colorectal cancer,<br>DNA, heparin and zinc ion binding                                                                                                                                  | ↓ |
|        | IPI00411961 |                                                 |          |      |                                                                                                                                                                                                           |   |
| D20/22 |             | calreticulin precursor                          | 48111.8  | 4.29 | soluble analog of calnexin,<br>chaperone of protein folding                                                                                                                                               | ↑ |
|        | IPI00020599 |                                                 |          |      |                                                                                                                                                                                                           |   |
| D24    |             | Keratin 9                                       | 62026.8  | 5.14 | a type I cytokeratin, found only in<br>the terminally differentiated<br>epidermis of palms and soles                                                                                                      | ↓ |
|        | IPI00019359 |                                                 |          |      |                                                                                                                                                                                                           |   |
